# Supplementary material for: Early versus standard return to play following ACL reconstruction: impact on volume of play and career longevity in 180 professional European soccer players: a retrospective cohort study
Source: Springer Nature journal article supplement (doi:10.1186/s10195-025-00837-y), 2025-05-12
Supplement: MOESM1 [file 10195_2025_837_MOESM1_ESM.pdf]

## DECLARATIONS

Ethics approval and consent to participate: the study was approved by the institutional review board (prot. Professionisti\_OSS\_22)

Consent for publication: not applicable

Availability of data and material: no additional data are available. Data are available on reasonable request to the corresponding author.

Competing interests: the authors declare that they have no competing interests

Funding: not applicable

Authors' contribution:

Michael Battaglia: conceived and designed the analysis

Justin W. Arner: wrote the paper

Kaare S. Midtgaard: stats analysis

Daniel B. Haber: wrote the paper

Liam A. Peebles: wrote the paper

Annalise M. Peebles: critical revisions

Phob Ganokroj: critical revisions

Ryan J. Whalen: critical revisions

Matthew T. Provencher: conceived and designed the analysis

Guglielmo Torre: critical revisions

Riccardo Ciatti: critical revisions and submission according to guidelines of the journal

Pier Paolo Mariani: conceived and designed the analysis

Acknowledgements: not applicable
